# Supplementary material
Source: HighWire-hosted journal article supplement (http://cmajopen.ca/highwire/filestream/90154/field_highwire_adjunct_files/0/open-2022-0194-1-at.pdf)
Supplement: open-2022-0194-1-at.pdf [file open-2022-0194-1-at.pdf]

**Table E1** – Number of patients by province and site

| Variable                                           | Wave        |             |             |                 |
|----------------------------------------------------|-------------|-------------|-------------|-----------------|
|                                                    | 1st (n=520) | 2nd (n=575) | 3rd (n=265) | Omicron (n=441) |
| Province, n (%)                                    |             |             |             |                 |
| BC                                                 | 136 (26.2)  | 361 (62.8)  | 200 (75.5)  | 226 (51.2)      |
| ON                                                 | 24 (4.6)    | 203 (35.3)  | 65 (24.5)   | 184 (41.7)      |
| QC                                                 | 360 (69.2)  | 11 (1.9)    | 0 (0.0)     | 31 (7.0)        |
| Site, n (%)                                        |             |             |             |                 |
| St. Paul's Hospital, Vancouver, BC                 | 66 (12.7)   | 92 (16.0)   | 55 (20.8)   | 131 (29.7)      |
| Vancouver General Hospital, Vancouver, BC          | 55 (10.6)   | 157 (27.3)  | 109 (41.1)  | 0 (0.0)         |
| Surrey Memorial Hospital, Surrey, BC               | 15 (2.9)    | 112 (19.5)  | 36 (13.6)   | 95 (21.5)       |
| Humber River Hospital, North York, ON              | 0 (0.0)     | 45 (7.8)    | 6 (2.3)     | 0 (0.0)         |
| Kingston General Hospital, Kingston, ON            | 4 (0.8)     | 13 (2.3)    | 1 (0.4)     | 0 (0.0)         |
| Mount Sinai Hospital, Toronto, ON                  | 20 (3.8)    | 82 (14.3)   | 42 (15.8)   | 31 (7.0)        |
| Sunnybrook Hospital, Toronto, ON                   | 0 (0.0)     | 63 (11.0)   | 16 (6.0)    | 153 (34.7)      |
| McGill University Health Centre, Montreal, QC      | 258 (49.6)  | 0 (0.0)     | 0 (0.0)     | 0 (0.0)         |
| Centre hospitalier universitaire de Sherbrooke, QC | 102 (19.6)  | 11 (1.9)    | 0 (0.0)     | 31 (7.0)        |

## Table S1

We enrolled 2767 COVID-19 patients in ARBs CORONA I. The following patients were excluded from the current analysis.

- Acute COVID-19 readmissions (n=83)
- Emergency Room admissions without hospitalization (n=149)
- Patients admitted to hospital but not due to acute COVID-19 (n=362; see file below)
- Patients with unknown discharge outcome or currently still hospitalized (n=19)
- Patients from sites which only enrolled ICU patients (Alberta; n=353)

Alberta site was different from the other participating sites in that it only enrolled patients who were admitted to ICU. Because the percentage of data from Alberta in ARBs CORONA I varied across waves (13%, 28%, 16% and 0% in waves 1, 2, 3 and Omicron respectively), the inclusion of Alberta site would thus confound and skew the crude results (for example, with the inclusion of Alberta data, ICU admission rate became 47%, 55%, 44% and 28% in waves 1, 2, 3 and Omicron respectively).

Pre-existing use of angiotensin receptor blockers and angiotensin-converting enzyme inhibitors prior to admission in patients included in the current study were 284/1794 (15.8%) and 332/1794 (18.5%) respectively.

| Primary reason for admission                                                                | Frequency |
|---------------------------------------------------------------------------------------------|-----------|
| 24 hr history of diffuse full body pain and elevated serum glucose (BS 33) and hyperkalemia | 1         |
| 4 days of decreased appetite, generalized weakness and immobility.                          | 1         |
| CHF VS INFECTION                                                                            | 1         |
| ADMITTED FOR LABOUR , HAD A C-SECTION , DEVELOPED SYMPTOMS LATER                            | 1         |

|                                                                         |   |
|-------------------------------------------------------------------------|---|
| ADNK colon                                                              | 1 |
| AKI                                                                     | 2 |
| AMS, aggressive behaviour, UTI                                          | 1 |
| Abdominal pain                                                          | 2 |
| Abdominal pain and ascites                                              | 1 |
| Abdominal pain, AKI, Lactic Acidosis                                    | 1 |
| Absence seizures and Orthostatic hypotension                            | 1 |
| Acute Lithium Intoxication                                              | 1 |
| Acute Subdural Hematoma from fall                                       | 1 |
| Acute abdominal pain, perforated viscus                                 | 1 |
| Acute alcohol hepatitis                                                 | 1 |
| Acute cholecystitis                                                     | 1 |
| Acute diverticulitis                                                    | 1 |
| Acute kidney injury due to volume depletion                             | 1 |
| Acute kidney injury secondary to bladder outlet obstruction from cancer | 1 |
| Acute on chronic leg swelling and difficulty mobilizing                 | 1 |
| Admitted for adverse reaction of chemotherapy (rash)                    | 1 |
| elective laparoscopic right hemicolectomy for an ascending colon cancer | 1 |
| Advance Dementia, Delirium, Anorexia                                    | 1 |
| Afib flutter and worsening SOB                                          | 1 |
| Aggressive behaviour                                                    | 1 |
| Alcohol Withdrawal                                                      | 2 |
| Alcohol withdrawal, Mallory-Weiss Tear.                                 | 1 |
| Altered LOC                                                             | 1 |
| Altered mental status                                                   | 2 |
| Antidepressant overdose                                                 | 1 |
| Aplastic anemia (new diagnosis)                                         | 1 |
| Appendicitis                                                            | 2 |
| Arm Paralysis                                                           | 1 |
| Ascites                                                                 | 1 |
| Aspiration pneumonia                                                    | 1 |
| Asthma exacerbation                                                     | 1 |
| Ataxia                                                                  | 1 |
| Atrial fibrillation                                                     | 1 |
| BILIARY COLIC                                                           | 1 |
| BRBPR                                                                   | 1 |
| Back Pain                                                               | 2 |
| Back pain, urinary retention                                            | 1 |
| Back soft tissue mass and abscess                                       | 1 |

Appendix 1, as supplied by the authors. Appendix to: Lee T, Cheng MP, Vinh DC, et al. Outcomes and characteristics of patients hospitalized for COVID-19 in British Columbia, Ontario and Quebec during the Omicron wave. *CMAJ Open* 2023. doi: 10.9778/cmajo.20220194. Copyright © 2023 The Author(s) or their employer(s). To receive this resource in an accessible format, please contact us at [cmajgroup@cmaj.ca](mailto:cmajgroup@cmaj.ca).

|                                                                                 |   |
|---------------------------------------------------------------------------------|---|
| Bacériémir strep group b                                                        | 1 |
| Bifrontal and left temporal contusions with IVH                                 | 1 |
| Bilateral leg cellulitis                                                        | 2 |
| Bilateral leg swelling, dyspnea                                                 | 1 |
| Biphasic stridor, increased WOB, positive steeple sign                          | 1 |
| Blocked right nephrotomy tube and scrotum leakage of urine NYD.                 | 1 |
| Brain mets                                                                      | 1 |
| Brain tumour resection                                                          | 1 |
| Burns 10-12% TBSA requiring excision and grafting.                              | 1 |
| C6-C7 fracture dislocation with ASIA B spinal cord injury                       | 1 |
| CAD                                                                             | 1 |
| CARDIAC - NSTEMI                                                                | 1 |
| CHEST PAIN                                                                      | 1 |
| COPD exacerbation                                                               | 3 |
| COPD exacerbation and altered LOC                                               | 1 |
| Rectal mass                                                                     | 1 |
| CVA for EVT                                                                     | 1 |
| Canceled elective right total knee arthroplasty, admitted due to blood pressure | 1 |
| Cancer of ascending colon                                                       | 1 |
| Cardiac arrest                                                                  | 3 |
| Cellulitis                                                                      | 3 |
| Cerebrovascular Accident (Stroke), Decreased Level of Consciousness             | 1 |
| Chemotherapy administration.                                                    | 1 |
| Closed trimalleolar ankle fracture-right                                        | 1 |
| Clostridium difficile colitis                                                   | 2 |
| Cognitive and functional decline                                                | 1 |
| Cognitive impairment                                                            | 1 |
| Colitis, with significant incontinence of stool.                                | 1 |
| Congestive heart failure and acute non ST elevation myocardial infarction       | 1 |
| Constipation                                                                    | 1 |
| Cystic Fibrosis Exacerbation/Influenza positive                                 | 1 |
| DKA                                                                             | 1 |
| DKA, Fever NYD +Trop                                                            | 1 |
| Decompensated heart failure                                                     | 1 |
| Decreased lost of consciousness, long-term care placement for safety            | 1 |

|                                                                                                      |    |
|------------------------------------------------------------------------------------------------------|----|
| Decreased renal function and graft pyelonephritis (post renal transplant 28Nov2020)                  | 1  |
| Deep sternal wound infection                                                                         | 1  |
| Delirium                                                                                             | 6  |
| Depressive episode with suicidal thoughts                                                            | 1  |
| Diabetic foot ulcer                                                                                  | 1  |
| Diabetic ketoacidosis                                                                                | 3  |
| Dialysis line infection                                                                              | 1  |
| Diarrhea from shigella and campylobacter                                                             | 1  |
| Diarrhea, feeling faint                                                                              | 1  |
| Disseminated TB                                                                                      | 1  |
| Disseminated aspergillosis                                                                           | 1  |
| Dysphagia and aspiration pneumonia                                                                   | 1  |
| Dyspnea                                                                                              | 1  |
| Dyspnea and chest pain secondary to pulmonary embolism                                               | 1  |
| E.COLI BACTERAEMIA                                                                                   | 2  |
| ENTEROCOCCAL SEPSIS                                                                                  | 1  |
| ESRD                                                                                                 | 1  |
| Elective resection of recurrent liposarcoma                                                          | 1  |
| Empyema                                                                                              | 1  |
| End-stage liver disease secondary to alcohol induced cirrhosis and probable hepatocellular carcinoma | 1  |
| Endocarditis                                                                                         | 1  |
| Epidural hematoma                                                                                    | 1  |
| Erythroderma psoraticum; Erythrodermic psoriasis; Flexural psoriasis                                 | 1  |
| Esophageal cancer                                                                                    | 1  |
| Exacerbation of ILD                                                                                  | 1  |
| FA rapide                                                                                            | 1  |
| FOR UNSTABLE ANGINA/ANGIOGRAPHY TO BE DONE                                                           | 1  |
| Failure to cope, Korsakoff's encephalopathy and cirrhosis                                            | 1  |
| Fall                                                                                                 | 16 |
| Family called ambulance because of a noted right- sided facial droop and inability to walk today     | 1  |
| Fast AF, CHF                                                                                         | 1  |
| Fast AFib                                                                                            | 1  |
| Febrile Neutropenia                                                                                  | 1  |
| Febrile neutropenia and sepsis                                                                       | 1  |

|                                                                                                                                                   |   |
|---------------------------------------------------------------------------------------------------------------------------------------------------|---|
| Fever, Hypotension                                                                                                                                | 1 |
| Foot gangrene                                                                                                                                     | 1 |
| Functional decline                                                                                                                                | 2 |
| GI Bleed                                                                                                                                          | 1 |
| Generalized weakness and Fatigue                                                                                                                  | 1 |
| Generalized weakness and abdominal distension.                                                                                                    | 1 |
| Geriatric - Falls                                                                                                                                 | 1 |
| HYPONATREMIA, ACUTE ON CHRONIC KIDNEY INJURY                                                                                                      | 1 |
| Heart failure                                                                                                                                     | 1 |
| Heat Exhaustion, Rhabdomyolysis                                                                                                                   | 1 |
| Hip fracture                                                                                                                                      | 1 |
| Hip pain                                                                                                                                          | 1 |
| Hydropneumothorax                                                                                                                                 | 1 |
| Hypercalcemia                                                                                                                                     | 1 |
| Hypercalcemia, AKI, and metastatic cancer in spine                                                                                                | 1 |
| Hypoglycemia                                                                                                                                      | 1 |
| Hyponatremia                                                                                                                                      | 1 |
| Hypotensive                                                                                                                                       | 1 |
| Hypoxia, intubated when transferred                                                                                                               | 1 |
| Hypoxia/Lung Mass                                                                                                                                 | 1 |
| ICA Stroke                                                                                                                                        | 1 |
| IgA Kappa Multiple Myeloma with diffuse lytic lesions                                                                                             | 1 |
| Ileus                                                                                                                                             | 1 |
| Incisional hernia                                                                                                                                 | 1 |
| Inferior STEMI                                                                                                                                    | 1 |
| Intermediate high-risk PE provoked by recent major surgery (CABG)                                                                                 | 1 |
| Intracerebral haemorrhage                                                                                                                         | 1 |
| Intracranial hemorrhage                                                                                                                           | 1 |
| Intractable hiccups                                                                                                                               | 1 |
| Involved in an MVC and sustained fractures to the L5 & S1, Rt superior pubic ramus, Fibula & tibia, and injury to the Rt kidney and adrenal gland | 1 |
| Ischemic colitis                                                                                                                                  | 1 |
| Left ICA /MCA                                                                                                                                     | 1 |
| Left eye trauma                                                                                                                                   | 1 |
| Left foot infection                                                                                                                               | 1 |
| Left foot osteomyelitis                                                                                                                           | 1 |

|                                                                                        |    |
|----------------------------------------------------------------------------------------|----|
| Left intertroch fracture                                                               | 1  |
| Left lower lobe pneumonia                                                              | 1  |
| Leg cellulitis                                                                         | 3  |
| Liver Failure                                                                          | 1  |
| Liver cirrhosis                                                                        | 1  |
| Low CSF pressure headache                                                              | 1  |
| Lower extremity pain (neoplastic context)                                              | 1  |
| Lower left left infection                                                              | 1  |
| Lung cancer resection                                                                  | 1  |
| MCA stroke                                                                             | 1  |
| METASTATIC lung cancer                                                                 | 1  |
| MS exacerbation                                                                        | 1  |
| Major neurocognitive disorder                                                          | 1  |
| Mechanical fall                                                                        | 1  |
| Melena                                                                                 | 1  |
| Melena and abdominal pain                                                              | 1  |
| Met/Endo DKA                                                                           | 1  |
| Met/end Hypokalemia                                                                    | 1  |
| Methicillin-sensitive Staphylococcus aureus bacteremia with sepsis                     | 1  |
| Multiple sclerosis, rhabdomyolysis                                                     | 1  |
| Multisystem Trauma                                                                     | 1  |
| Myasthenia Gravis                                                                      | 1  |
| Myelodysplastic syndrome                                                               | 1  |
| Myelopathy secondary to dural fistula                                                  | 1  |
| NSTEMI                                                                                 | 1  |
| Nausea and alcohol withdrawal                                                          | 1  |
| Nausea, vomiting, diarrhea                                                             | 1  |
| Neck mass, lymphadenopathy                                                             | 1  |
| Neph peritonitis                                                                       | 1  |
| Neurological disorders                                                                 | 1  |
| New bullous lesion on hand                                                             | 1  |
| Newly diagnosed HIV                                                                    | 1  |
| Non hodgkins lymphoma                                                                  | 1  |
| Non neutropenic fever with hypotension                                                 | 1  |
| Not specified (but not COVID-19)                                                       | 27 |
| Opioid and benzo withdrawal                                                            | 1  |
| PALPITATIONS                                                                           | 1  |
| Pain from pulmonary ADNK                                                               | 1  |
| Pancreatitis                                                                           | 1  |
| Partial sigmoid volvulus                                                               | 1  |
| Patient is a self referral for dark tarry stools (being managed as a case of H.pylori) | 1  |

|                                                                                                               |   |
|---------------------------------------------------------------------------------------------------------------|---|
| Pericardial Effusion                                                                                          | 1 |
| Pericarditis                                                                                                  | 1 |
| Perte autonomie                                                                                               | 1 |
| Perte d'autonomie                                                                                             | 1 |
| Pleural Effusion                                                                                              | 1 |
| Pneumonia                                                                                                     | 4 |
| Pneumonia and hypernatremia                                                                                   | 1 |
| Pneumonia/pneumonitis                                                                                         | 1 |
| Polysubstance OD                                                                                              | 1 |
| Polytrauma                                                                                                    | 2 |
| Poor food intake, leg swelling, abdominal distension, increasing jaundice and generalized weakness for 1 week | 1 |
| Port-a-cath bacterial infection                                                                               | 1 |
| Possible stroke                                                                                               | 1 |
| Post Cardiac Arrest                                                                                           | 1 |
| Post op meningioma resection                                                                                  | 1 |
| Pregnancy                                                                                                     | 3 |
| Presented with a new R) wrist fracture in the context of a week history of increased falls.                   | 1 |
| Presyncope                                                                                                    | 1 |
| Progressive pulmonary mets                                                                                    | 1 |
| Prosthetic knee infection                                                                                     | 1 |
| Psychiatric                                                                                                   | 1 |
| Psychosis                                                                                                     | 1 |
| Pt fell from 6 story building onto concrete                                                                   | 1 |
| Pyelonephritis                                                                                                | 1 |
| R/O TB given contact history                                                                                  | 1 |
| Radiation-induced oral mucositis                                                                              | 1 |
| Rapid atrial fibrillation                                                                                     | 1 |
| Rectal cancer                                                                                                 | 1 |
| Recurrent SOB and malignant plueral effusion                                                                  | 1 |
| Recurrent falls                                                                                               | 1 |
| Renal transplant with postoperative course complicated with delirium                                          | 1 |
| Resp COPD exacerbation                                                                                        | 1 |
| Retroperitoneal leiomyosarcoma                                                                                | 1 |
| Right Hip Fracture                                                                                            | 1 |
| Right MCA/ACA/ICA stroke                                                                                      | 1 |
| Right sinonasal inverting papilloma                                                                           | 1 |
| Right thumb flexor tenosynovitis                                                                              | 1 |
| Rule out stroke vs complex migraine                                                                           | 1 |
| SBO                                                                                                           | 1 |



|                                                                                                                       |   |
|-----------------------------------------------------------------------------------------------------------------------|---|
| SIGMOID VOLVULUS, SMALL BOWEL OBSTRUCTION                                                                             | 1 |
| STADE IV PANCREAS NEOPLASIA                                                                                           | 1 |
| STEMI                                                                                                                 | 4 |
| SUSPECTED PELVIC INFLAMMATORY DISEASE                                                                                 | 1 |
| Schizophrenia                                                                                                         | 1 |
| Seizure                                                                                                               | 2 |
| Seizure versus delirium. Recovered from COVID-19 infection on 26-Mar-2021                                             | 1 |
| Seizures                                                                                                              | 1 |
| Sepsis                                                                                                                | 5 |
| Severe abdominal pain and constipation                                                                                | 1 |
| Severe hyponatremia                                                                                                   | 1 |
| Shortness of breadth and loss of consciousness suggestive of a seizure.                                               | 1 |
| Shunt infection                                                                                                       | 1 |
| Small right temporal intracerebral hemmorrhage post fall                                                              | 1 |
| Social admission                                                                                                      | 1 |
| Spinal cord compression                                                                                               | 1 |
| Spontaneous hemarthrosis                                                                                              | 1 |
| Stomach ache with emesis (Covid +ve)                                                                                  | 1 |
| Stroke                                                                                                                | 3 |
| Subacute on chronic functional decline                                                                                | 1 |
| Subarachnoid haemorrhage from vertebral artery (stroke)                                                               | 1 |
| Subarachnoid hemorrhage and Covid pneumonia                                                                           | 1 |
| T5 compression fracture following a fall from standing height. This is on background of progressive gait instability. | 1 |
| TTP                                                                                                                   | 1 |
| Tenosynovitis Flexors (Hand)                                                                                          | 1 |
| Thigh abscess                                                                                                         | 1 |
| Tibial plateau fracture                                                                                               | 1 |
| Tracheal Bleed                                                                                                        | 1 |
| Trauma                                                                                                                | 4 |
| Traumatic fall with subdural hematoma                                                                                 | 1 |
| Traumatic subdural hematomas                                                                                          | 1 |
| Treatment for T-Cell lymphoma                                                                                         | 1 |
| Triple vessel coronary artery disease                                                                                 | 1 |
| UGIB                                                                                                                  | 1 |
| URO - RENAL COLIC                                                                                                     | 1 |

|                                                                                                         |   |
|---------------------------------------------------------------------------------------------------------|---|
| UTI                                                                                                     | 1 |
| Upper gastrointestinal bleed                                                                            | 3 |
| Urosepsis                                                                                               | 2 |
| Vaso occlusive crisis                                                                                   | 1 |
| Vertebral Fracture                                                                                      | 1 |
| Viral illness ,delirium                                                                                 | 1 |
| Chest pain post stent operation                                                                         | 1 |
| Weakness                                                                                                | 1 |
| Weakness and falls                                                                                      | 1 |
| Wet grangrene 2/2 diabetes                                                                              | 1 |
| Work of weakness, gurgling sounds with breathing when lying down, history of fall 2 days ago , feverish | 1 |
| Workup of neuropathy- diagnosis of NMDA encephalopathy                                                  | 1 |

**Table E2** – Co-morbidities of Omicron wave patients admitted with acute COVID-19 by vaccination status

| Variable                      | Vaccination status   |                  | P      |
|-------------------------------|----------------------|------------------|--------|
|                               | Unvaccinated (n=130) | ≥2 doses (n=242) |        |
| Co-morbidities, n (%)         |                      |                  |        |
| Any of the four below         | 82/130 (63.1)        | 205/242 (84.7)   | <0.001 |
| Chronic cardiac disease       | 39/130 (30.0)        | 112/241 (46.5)   | 0.002  |
| Chronic kidney disease        | 14/130 (10.8)        | 71/240 (29.6)    | <0.001 |
| Hypertension                  | 63/130 (48.5)        | 159/242 (65.7)   | 0.001  |
| Diabetes                      | 39/130 (30.0)        | 90/242 (37.2)    | 0.165  |
| Chronic pulmonary disease     | 23/130 (17.7)        | 54/241 (22.4)    | 0.285  |
| Liver disease                 | 2/130 (1.5)          | 14/239 (5.9)     | 0.052  |
| Chronic neurological disorder | 19/130 (14.6)        | 45/238 (18.9)    | 0.299  |
| Malignant neoplasm            | 11/130 (8.5)         | 48/240 (20.0)    | 0.004  |
| Chronic hematologic disease   | 7/130 (5.4)          | 51/241 (21.2)    | <0.001 |
| AIDS / HIV                    | 2/127 (1.6)          | 1/238 (0.4)      | 0.278  |
| Rheumatologic disorder        | 15/130 (11.5)        | 32/240 (13.3)    | 0.621  |
| Dementia                      | 3/130 (2.3)          | 24/241 (10.0)    | 0.007  |
| Malnutrition                  | 1/129 (0.8)          | 2/241 (0.8)      | 1.000  |
| Obesity                       | 10/130 (7.7)         | 16/229 (7.0)     | 0.804  |

P value was based on Chi-square test or Fisher's exact test as appropriate.

**Table E3** – COVID-19 therapies during the hospital course of Omicron wave patients admitted with acute COVID-19 by vaccination status

| Variable                                  | Vaccination status   |                  | P     |
|-------------------------------------------|----------------------|------------------|-------|
|                                           | Unvaccinated (n=130) | ≥2 doses (n=242) |       |
| Co-intervention while hospitalized, n (%) |                      |                  |       |
| Antiviral agent                           | 34/129 (26.4)        | 81/241 (33.6)    | 0.151 |
| Remdesivir                                | 27/129 (20.9)        | 58/241 (24.1)    | 0.494 |
| Antibiotic                                | 92/130 (70.8)        | 163/242 (67.4)   | 0.499 |
| Corticosteroid                            | 109/130 (83.8)       | 182/242 (75.2)   | 0.054 |
| Dexamethasone                             | 99/130 (76.2)        | 159/242 (65.7)   | 0.037 |
| Antifungal agent                          | 10/129 (7.8)         | 14/241 (5.8)     | 0.470 |

P value was based on Chi-square test or Fisher's exact test as appropriate.

**Table E4**– Baseline characteristics of Omicron COVID-19 wave versus prior wave patients admitted to hospital for acute COVID-19.

| Variable                                                                | Wave                 |                      |                      |                      | p <sup>1</sup> | p <sup>2</sup> | p <sup>3</sup> |
|-------------------------------------------------------------------------|----------------------|----------------------|----------------------|----------------------|----------------|----------------|----------------|
|                                                                         | 1st (n=520)          | 2nd (n=575)          | 3rd (n=265)          | Omicron (n=441)      |                |                |                |
| ARBs/ACEi prior to admission                                            |                      |                      |                      |                      | 0.376          | 0.102          | 0.178          |
| Unknown                                                                 | 7                    | 0                    | 1                    | 0                    |                |                |                |
| None                                                                    | 1178 (65.7)          | 344 (66.2)           | 364 (63.4)           | 186 (70.2)           |                |                |                |
| ARBs                                                                    | 284 (15.8)           | 82 (15.8)            | 105 (18.3)           | 38 (14.3)            |                |                |                |
| ACEi                                                                    | 332 (18.5)           | 94 (18.1)            | 105 (18.3)           | 41 (15.5)            |                |                |                |
| Sex, n (%)                                                              |                      |                      |                      |                      | 0.371          | 0.578          | 0.706          |
| Unknown                                                                 | 1                    | 0                    | 0                    | 1                    |                |                |                |
| Male                                                                    | 293 (56.5)           | 351 (61.0)           | 161 (60.8)           | 261 (59.3)           |                |                |                |
| Female                                                                  | 226 (43.5)           | 224 (39.0)           | 104 (39.2)           | 179 (40.7)           |                |                |                |
| Age, mean (SD)                                                          | 70.2 (16.3)          | 65.8 (17.3)          | 63.0 (17.1)          | 70.1 (15.2)          | 0.893          | <0.001         | <0.001         |
| Received any COVID-19 vaccine prior to admission, n (%)                 | 0/520 (0.0)          | 3/574 (0.5)          | 21/256 (8.2)         | 261/391 (66.8)       | <0.001         | <0.001         | <0.001         |
| Received at least 2 doses of COVID-19 vaccine prior to admission, n (%) | 0/520 (0.0)          | 0/574 (0.0)          | 0/256 (0.0)          | 242/390 (62.1)       | <0.001         | <0.001         | <0.001         |
| Admitted to ICU on hospital admission day, n (%)                        | 104 (20.0)           | 83 (14.4)            | 35 (13.3)            | 64 (14.5)            | 0.027          | 0.960          | 0.648          |
| Organ support on admission day                                          |                      |                      |                      |                      |                |                |                |
| Invasive mechanical ventilation, n (%)                                  | 55/520 (10.6)        | 34/575 (5.9)         | 16/265 (6.0)         | 20/441 (4.5)         | <0.001         | 0.332          | 0.380          |
| RRT or dialysis, n (%)                                                  | 8/511 (1.6)          | 7/570 (1.2)          | 4/262 (1.5)          | 8/439 (1.8)          | 0.759          | 0.439          | 0.770          |
| Vasopressors, n (%)                                                     | 35/520 (6.7)         | 33/575 (5.7)         | 14/265 (5.3)         | 18/440 (4.1)         | 0.074          | 0.234          | 0.461          |
| Temperature (°C) - mean (SD)                                            | 37.5 (0.9)           | 37.4 (0.9)           | 37.4 (0.9)           | 37.1 (0.9)           | <0.001         | <0.001         | <0.001         |
| Missing, n                                                              | 19                   | 9                    | 3                    | 16                   |                |                |                |
| Heart rate (beats per minute) - mean (SD)                               | 91.4 (20.6)          | 95.5 (20.3)          | 96.7 (19.2)          | 92.6 (21.5)          | 0.382          | 0.031          | 0.010          |
| Missing, n                                                              | 6                    | 4                    | 3                    | 2                    |                |                |                |
| Respiratory rate (breaths per minute) - mean (SD)                       | 22.9 (6.4)           | 24.9 (7.9)           | 24.1 (7.5)           | 23.2 (7.7)           | 0.413          | 0.001          | 0.144          |
| Missing, n                                                              | 15                   | 6                    | 4                    | 12                   |                |                |                |
| sBP - mean (SD)                                                         | 128.8 (22.9)         | 130.5 (23.5)         | 126.9 (20.6)         | 131.2 (26.9)         | 0.132          | 0.648          | 0.027          |
| Missing, n                                                              | 2                    | 5                    | 2                    | 7                    |                |                |                |
| dBp - mean (SD)                                                         | 73.7 (11.9)          | 74.3 (13.2)          | 72.4 (12.3)          | 73.9 (31.3)          | 0.060          | 0.013          | 0.760          |
| Missing, n                                                              | 3                    | 14                   | 9                    | 9                    |                |                |                |
| Oxygen saturation (SaO <sub>2</sub> ; %) - mean (SD)                    | 93.5 (4.2)           | 90.8 (8.5)           | 91.1 (7.8)           | 93.1 (6.7)           | 0.359          | <0.001         | <0.001         |
| Missing, n                                                              | 13                   | 3                    | 2                    | 5                    |                |                |                |
| Required oxygen therapy, n (%)                                          | 186/516 (36.0)       | 174/544 (32.0)       | 87/253 (34.4)        | 147/426 (34.5)       | 0.623          | 0.407          | 0.975          |
| WBC count ( ×10 <sup>3</sup> /μL) - Median (IQR)                        | 6.5 (4.9, 8.6)       | 6.9 (5.1, 9.2)       | 6.3 (4.7, 8.8)       | 7.3 (5.1, 9.9)       | 0.006          | 0.265          | 0.014          |
| Missing, n                                                              | 17                   | 6                    | 4                    | 3                    |                |                |                |
| Haemoglobin (g/L) - Median (IQR)                                        | 130.0 (118.0, 145.0) | 132.0 (117.0, 145.0) | 134.0 (119.0, 146.0) | 127.0 (111.0, 141.0) | 0.002          | <0.001         | <0.001         |

Appendix 1, as supplied by the authors. Appendix to: Lee T, Cheng MP, Vinh DC, et al. Outcomes and characteristics of patients hospitalized for COVID-19 in British Columbia, Ontario and Quebec during the Omicron wave. *CMAJ Open* 2023. doi: 10.9778/cmajo.20220194. Copyright © 2023 The Author(s) or their employer(s). To receive this resource in an accessible format, please contact us at [cmajgroup@cmaj.ca](mailto:cmajgroup@cmaj.ca).

| Variable                           | Wave                     |                       |                       |                           | P <sup>1</sup> | P <sup>2</sup> | P <sup>3</sup> |
|------------------------------------|--------------------------|-----------------------|-----------------------|---------------------------|----------------|----------------|----------------|
|                                    | 1st (n=520)              | 2nd (n=575)           | 3rd (n=265)           | Omicron (n=441)           |                |                |                |
| Missing, n                         | 15                       | 7                     | 4                     | 3                         |                |                |                |
| Creatinine (μmol/L) - Median (IQR) | 84.0 (68.0, 114.0)       | 87.0 (70.0, 120.5)    | 82.0 (66.0, 106.0)    | 95.0 (70.0, 136.0)        | 0.001          | 0.057          | <0.001         |
| Missing, n                         | 10                       | 11                    | 7                     | 4                         |                |                |                |
| ALT (U/L) - Median (IQR)           | 29.0 (17.0, 50.5)        | 35.0 (22.0, 57.0)     | 38.5 (23.0, 63.0)     | 23.0 (16.0, 38.0)         | 0.003          | <0.001         | <0.001         |
| Missing, n (%)                     | 156                      | 91                    | 39                    | 122                       |                |                |                |
| AST (U/L) - Median (IQR)           | 45.0 (26.0, 77.0)        | 46.0 (32.0, 77.0)     | 47.0 (38.0, 74.0)     | 38.5 (23.0, 59.0)         | 0.082          | 0.002          | <0.001         |
| Missing, n (%)                     | 430                      | 271                   | 106                   | 343                       |                |                |                |
| D-Dimer (ng/mL)- Median (IQR)      | 970.0 (580.0,<br>1860.0) | 912.5 (597.0, 1905.0) | 876.0 (636.5, 1423.5) | 1117.0 (578.0,<br>1892.0) | 0.622          | 0.801          | 0.355          |
| Missing, n (%)                     | 343                      | 325                   | 105                   | 346                       |                |                |                |

P value was based on Chi-square test or Fisher's exact test as appropriate.

1. Comparison between wave 1 and Omicron
2. Comparison between wave 2 and Omicron
3. Comparison between wave 3 and Omicron

**Figure E1.** Comorbidities of patients in Omicron wave versus prior wave patients admitted to hospital for acute COVID-19.

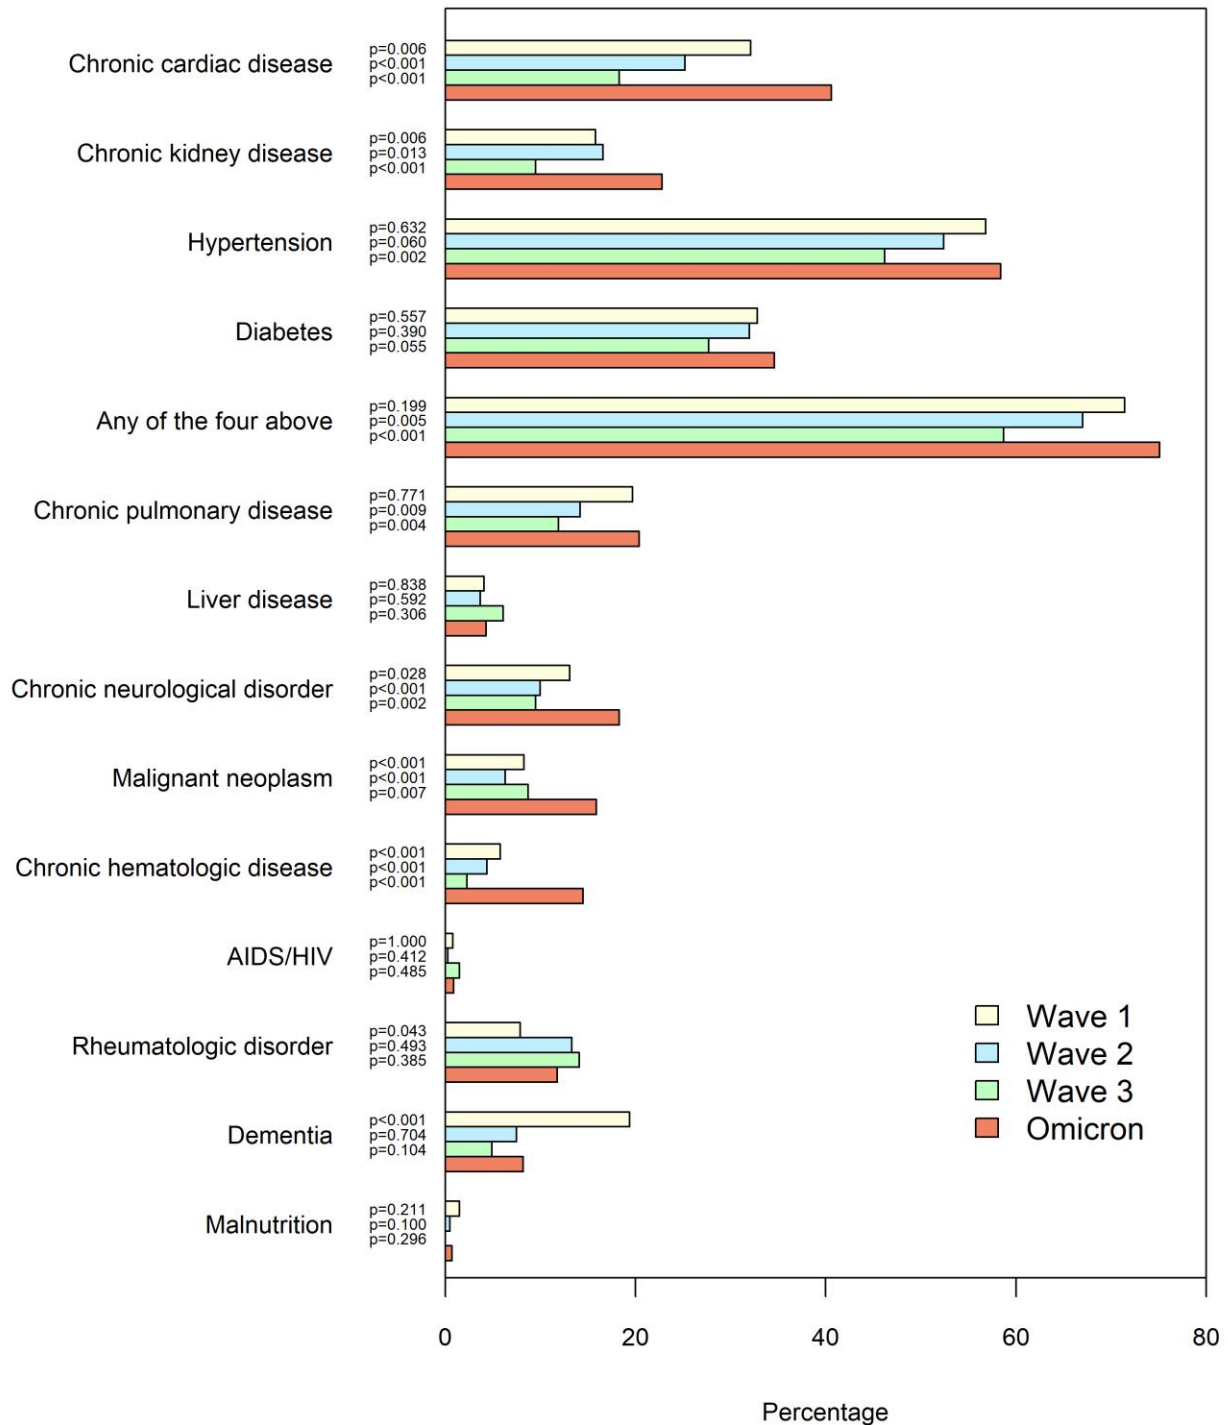

P value was based on Chi-square test or Fisher’s exact test as appropriate and was for the comparison between Omicron wave and waves 1,2 and 3.

| Variable                      | Wave           |                |                |                 | p <sup>1</sup> | p <sup>2</sup> | p <sup>3</sup> |
|-------------------------------|----------------|----------------|----------------|-----------------|----------------|----------------|----------------|
|                               | 1st (n=520)    | 2nd (n=575)    | 3rd (n=265)    | Omicron (n=441) |                |                |                |
| Co-morbidities, n (%)         |                |                |                |                 |                |                |                |
| Any of the four below         | 370/518 (71.4) | 383/572 (67.0) | 155/264 (58.7) | 331/441 (75.1)  | 0.207          | 0.005          | <0.001         |
| Chronic cardiac disease       | 166/517 (32.1) | 143/568 (25.2) | 48/262 (18.3)  | 179/440 (40.7)  | 0.006          | <0.001         | <0.001         |
| Chronic kidney disease        | 82/519 (15.8)  | 95/573 (16.6)  | 25/263 (9.5)   | 100/438 (22.8)  | 0.006          | 0.013          | <0.001         |
| Hypertension                  | 295/519 (56.8) | 300/572 (52.4) | 121/262 (46.2) | 257/441 (58.3)  | 0.654          | 0.064          | 0.002          |
| Diabetes                      | 170/518 (32.8) | 183/571 (32.0) | 73/264 (27.7)  | 152/441 (34.5)  | 0.590          | 0.418          | 0.060          |
| Chronic pulmonary disease     | 102/519 (19.7) | 81/570 (14.2)  | 31/261 (11.9)  | 90/440 (20.5)   | 0.757          | 0.009          | 0.004          |
| Liver disease                 | 21/517 (4.1)   | 21/573 (3.7)   | 16/264 (6.1)   | 19/438 (4.3)    | 0.832          | 0.586          | 0.310          |
| Chronic neurological disorder | 68/519 (13.1)  | 57/572 (10.0)  | 25/262 (9.5)   | 80/437 (18.3)   | 0.027          | <0.001         | 0.002          |
| Malignant neoplasm            | 43/517 (8.3)   | 36/567 (6.3)   | 23/263 (8.7)   | 70/439 (15.9)   | <0.001         | <0.001         | 0.006          |
| Chronic hematologic disease   | 30/518 (5.8)   | 25/572 (4.4)   | 6/263 (2.3)    | 64/440 (14.5)   | <0.001         | <0.001         | <0.001         |
| AIDS / HIV                    | 4/491 (0.8)    | 2/573 (0.3)    | 4/264 (1.5)    | 4/433 (0.9)     | 1.000          | 0.411          | 0.486          |
| Rheumatologic disorder        | 41/517 (7.9)   | 76/573 (13.3)  | 37/263 (14.1)  | 52/439 (11.8)   | 0.042          | 0.501          | 0.391          |
| Dementia                      | 100/516 (19.4) | 43/572 (7.5)   | 13/263 (4.9)   | 36/440 (8.2)    | <0.001         | 0.696          | 0.103          |
| Malnutrition                  | 8/517 (1.5)    | 3/573 (0.5)    | 0/264 (0.0)    | 3/439 (0.7)     | 0.212          | 1.000          | 0.295          |
| Obesity                       | 53/482 (11.0)  | 53/571 (9.3)   | 25/244 (10.2)  | 31/426 (7.3)    | 0.054          | 0.260          | 0.182          |



**Table E5.** COVID-19 therapies during the hospital course of Omicron COVID-19 wave versus prior wave patients admitted to hospital for acute COVID-19.

| Variable                                  | Wave           |                |                |                 | P <sup>1</sup> | P <sup>2</sup> | P <sup>3</sup> |
|-------------------------------------------|----------------|----------------|----------------|-----------------|----------------|----------------|----------------|
|                                           | 1st (n=520)    | 2nd (n=575)    | 3rd (n=265)    | Omicron (n=441) |                |                |                |
| Co-intervention while hospitalized, n (%) |                |                |                |                 |                |                |                |
| Antiviral agent                           | 72/516 (14.0)  | 107/572 (18.7) | 42/265 (15.8)  | 134/439 (30.5)  | <0.001         | <0.001         | <0.001         |
| Remdesivir                                | 8/516 (1.6)    | 96/572 (16.8)  | 27/265 (10.2)  | 99/439 (22.6)   | <0.001         | 0.021          | <0.001         |
| Antibiotic                                | 434/520 (83.5) | 488/575 (84.9) | 210/265 (79.2) | 306/441 (69.4)  | <0.001         | <0.001         | 0.004          |
| Corticosteroid                            | 160/520 (30.8) | 501/575 (87.1) | 241/265 (90.9) | 340/441 (77.1)  | <0.001         | <0.001         | <0.001         |
| Dexamethasone                             | 56/520 (10.8)  | 484/575 (84.2) | 235/265 (88.7) | 296/441 (67.1)  | <0.001         | <0.001         | <0.001         |
| Antifungal agent                          | 34/520 (6.5)   | 24/575 (4.2)   | 22/265 (8.3)   | 29/439 (6.6)    | 0.966          | 0.085          | 0.400          |

P value was based on Chi-square test or Fisher's exact test as appropriate.

1. Comparison between wave 1 and Omicron
2. Comparison between wave 2 and Omicron
3. Comparison between wave 3 and Omicron

**Table E6– Outcomes of Omicron COVID-19 wave versus prior wave patients admitted to hospital for acute COVID-19.**

| Variable                                            | Wave             |                  |                   |                   |
|-----------------------------------------------------|------------------|------------------|-------------------|-------------------|
|                                                     | 1st (n=520)      | 2nd (n=575)      | 3rd (n=265)       | Omicron (n=441)   |
| 28-day mortality, n (%)                             | 95/520 (18.3)    | 93/575 (16.2)    | 19/264 (7.2)      | 42/433 (9.7)      |
| In-hospital death, n (%)                            | 111/520 (21.3)   | 103/575 (17.9)   | 25/265 (9.4)      | 63/441 (14.3)     |
| Admitted to ICU, n (%)                              | 201/520 (38.7)   | 217/575 (37.7)   | 89/264 (33.7)     | 121/441 (27.4)    |
| Septic shock, n (%)                                 | 50/510 (9.8)     | 44/547 (8.0)     | 15/255 (5.9)      | 39/430 (9.1)      |
| Acute respiratory distress syndrome, n (%)          | 107/490 (21.8)   | 100/540 (18.5)   | 34/256 (13.3)     | 66/437 (15.1)     |
| Acute kidney injury, n (%)                          | 131/513 (25.5)   | 132/538 (24.5)   | 34/246 (13.8)     | 119/429 (27.7)    |
| Acute cardiac injury, n (%)                         | 40/495 (8.1)     | 47/547 (8.6)     | 17/252 (6.7)      | 18/418 (4.3)      |
| Organ support while hospitalized, n (%)             |                  |                  |                   |                   |
| Invasive mechanical ventilation                     | 130/520 (25.0)   | 118/575 (20.5)   | 42/265 (15.8)     | 61/441 (13.8)     |
| RRT or dialysis                                     | 33/511 (6.5)     | 30/570 (5.3)     | 7/262 (2.7)       | 30/439 (6.8)      |
| Vasopressors                                        | 120/520 (23.1)   | 125/575 (21.7)   | 49/265 (18.5)     | 70/440 (15.9)     |
| Organ support during first 14 days, n (%)           |                  |                  |                   |                   |
| Invasive mechanical ventilation                     | 127/520 (24.4)   | 116/575 (20.2)   | 40/265 (15.1)     | 53/439 (12.1)     |
| RRT or dialysis                                     | 26/508 (5.1)     | 24/568 (4.2)     | 6/262 (2.3)       | 23/436 (5.3)      |
| Vasopressors                                        | 116/520 (22.3)   | 122/574 (21.3)   | 47/264 (17.8)     | 62/437 (14.2)     |
| DAF invasive mechanical ventilation - first 14 days |                  |                  |                   |                   |
| Mean (SD)                                           | 10.0 (5.9)       | 11.0 (5.3)       | 12.1 (4.4)        | 12.5 (4.0)        |
| Unknown, n                                          | 2                | 2                | 3                 | 18                |
| DAF RRT- first 14 days                              |                  |                  |                   |                   |
| Mean (SD)                                           | 11.8 (5.0)       | 12.3 (4.5)       | 13.1 (3.3)        | 13.1 (3.2)        |
| Unknown, n                                          | 11               | 5                | 2                 | 23                |
| DAF Vasopressors - first 14 days                    |                  |                  |                   |                   |
| Mean (SD)                                           | 10.7 (5.5)       | 11.3 (5.0)       | 12.4 (3.9)        | 12.6 (3.8)        |
| Unknown, n                                          | 2                | 2                | 2                 | 20                |
| Hospital length of stay- decedents                  |                  |                  |                   |                   |
| n                                                   | 111              | 103              | 24                | 48                |
| Median (IQR)                                        | 11.0 (6.0, 21.0) | 11.0 (7.0, 20.0) | 12.0 (9.5, 24.0)  | 16.5 (9.5, 35.5)  |
| Range                                               | (0.0, 63.0)      | (1.0, 44.0)      | (2.0, 62.0)       | (2.0, 246.0)      |
| Hospital length of stay- survivors                  |                  |                  |                   |                   |
| n                                                   | 409              | 471              | 240               | 378               |
| Median (IQR)                                        | 15.0 (7.0, 26.0) | 9.0 (5.0, 17.0)  | 9.0 (5.0, 17.0)   | 8.0 (4.0, 16.0)   |
| Range                                               | (2.0, 151.0)     | (2.0, 313.0)     | (2.0, 114.0)      | (1.0, 143.0)      |
| ICU length of stay - decedents                      |                  |                  |                   |                   |
| n                                                   | 51               | 57               | 12                | 37                |
| Median (IQR)                                        | 15.0 (5.0, 26.0) | 12.0 (7.0, 21.0) | 21.5 (10.0, 45.5) | 15.0 (10.0, 29.0) |
| Range                                               | (0.0, 61.0)      | (0.0, 38.0)      | (3.0, 57.0)       | (0.0, 246.0)      |
| ICU length of stay - survivors                      |                  |                  |                   |                   |
| n                                                   | 149              | 159              | 73                | 77                |
| Median (IQR)                                        | 10.0 (4.0, 17.0) | 7.0 (4.0, 12.0)  | 9.0 (3.0, 16.0)   | 6.0 (3.0, 12.0)   |
| Range                                               | (0.0, 92.0)      | (0.0, 113.0)     | (1.0, 75.0)       | (0.0, 85.0)       |

**Figure E2.** Comparison of outcomes between COVID-19 Omicron and prior waves by regression analysis – among unvaccinated patients.

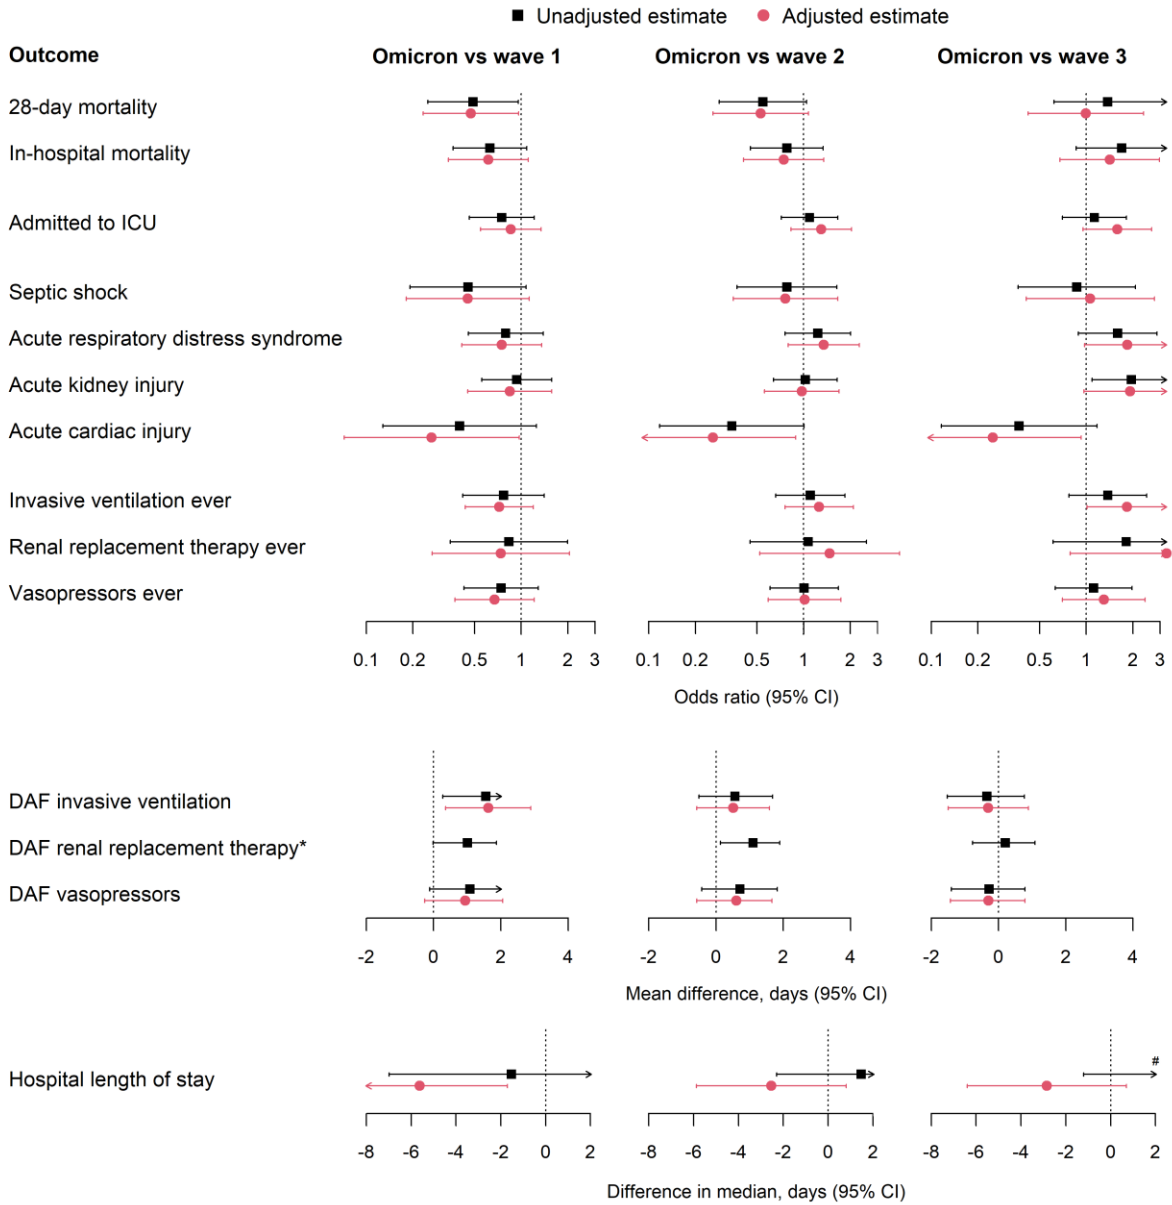

The following factors were accounted for in the adjusted analysis: age, sex, co-morbidities (chronic heart disease, hypertension, chronic kidney disease, diabetes, chronic pulmonary disease, chronic neurological disorder, cancer and chronic hematologic disease), baseline systolic blood pressure, heart rate, SaO<sub>2</sub> and serum creatinine.

\*Adjusted regression analysis was not feasible numerically as too few patients received renal replacement therapy during the first 14 days

# Estimated difference from unadjusted regression analysis was 2.46 days.
